# Supplementary material for: Thioredoxin activity confers resistance against oxidative stress in tumor-infiltrating NK cells
Source: JCI journal article supplement (doi:10.1172/jci137585), 2020-07-16
Supplement: sd1 [file 1]

## Supplementary Figure 1.

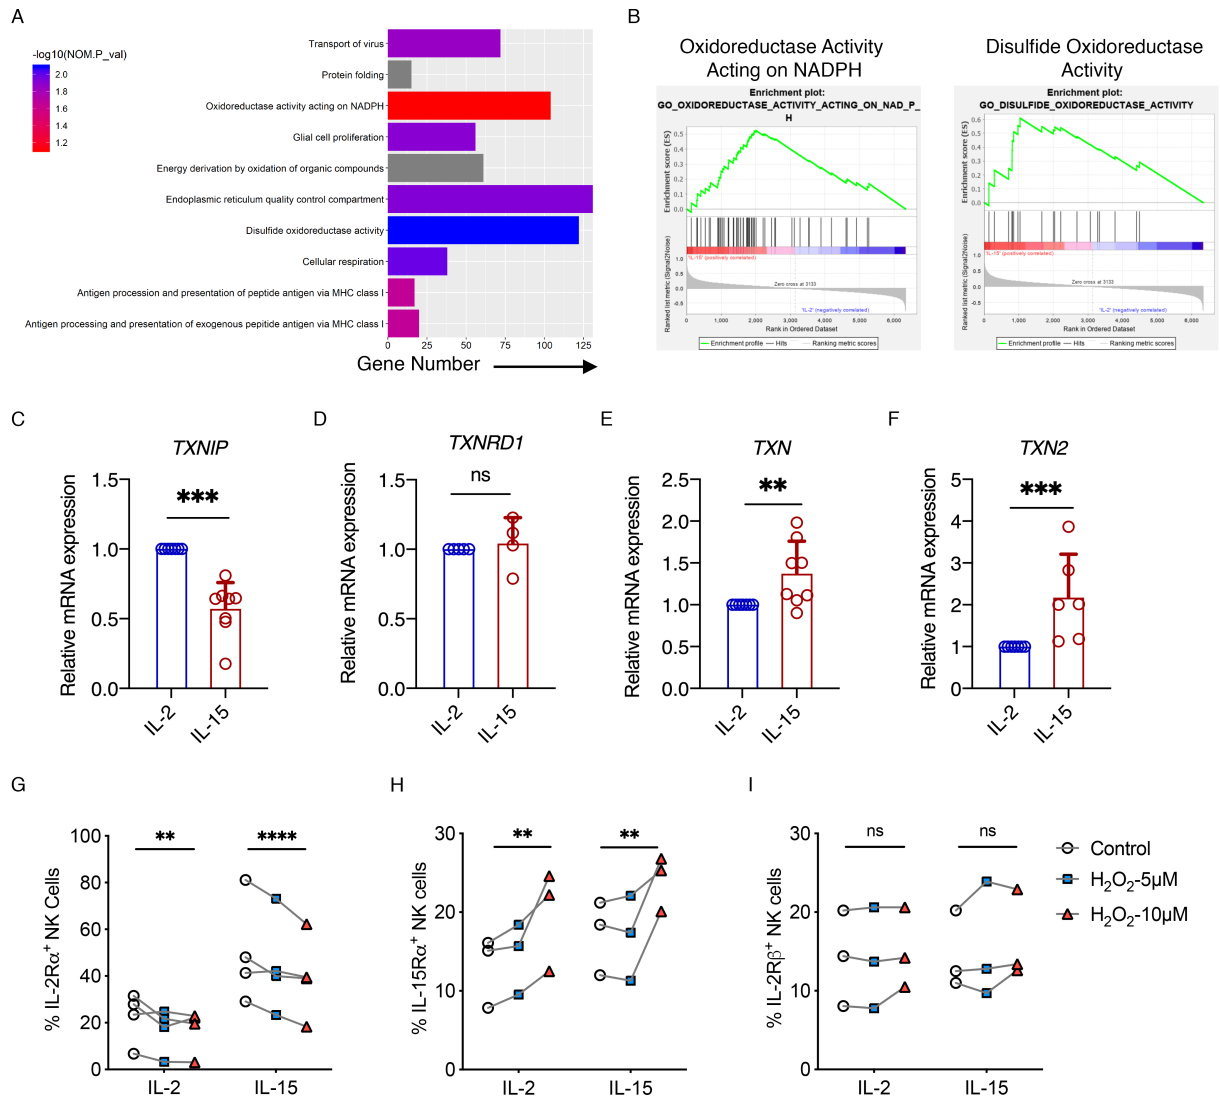

### Supplementary Figure 1. IL-15 primed NK cells differentially expressed thioredoxin system to mount superior immune responses.

(A) Gene Enrichment Analysis using C5 GO set for biological processes with cut-off at nominal P-value < 0.01 and the maximum and minimum size for selection were 500 and 15 genes, respectively. X-axis represents the number of genes while the y-axis represents the top 10 GO gene sets based on enrichment score. (B) GSEA analysis in oxidoreductase activity based on differential gene expression of IL-15 versus IL-2-primed NK cells. (C-F) Relative mRNA expression of (C) *TXNIP* (n=8), (D) *TXNRD1* (n=5), (E) *TXN* (n=8) and (F) *TXN2* (n=6) based on qRT-PCR; data points are presented as mean  $\pm$  SD; Mann-Whitney test was used to test for significance. \*\*P<0.01, \*\*\*P<0.001 and ns for non-significant. (G-I) Percentage of NK cells expressing (G) IL-2R $\alpha$  (n=4), (H) IL-15R $\alpha$  (n=3), (I) IL-2R $\beta$  (n=3) after primed with either IL-2 or IL-15, in the presence or absence of H<sub>2</sub>O<sub>2</sub> treatment, data points are connected for matching replicates; two-way ANOVA with Sidak's multiple comparisons were used to test for significance, \*\*P<0.01, \*\*\*P<0.001 and ns for non-significant.

## Supplementary Figure 2.

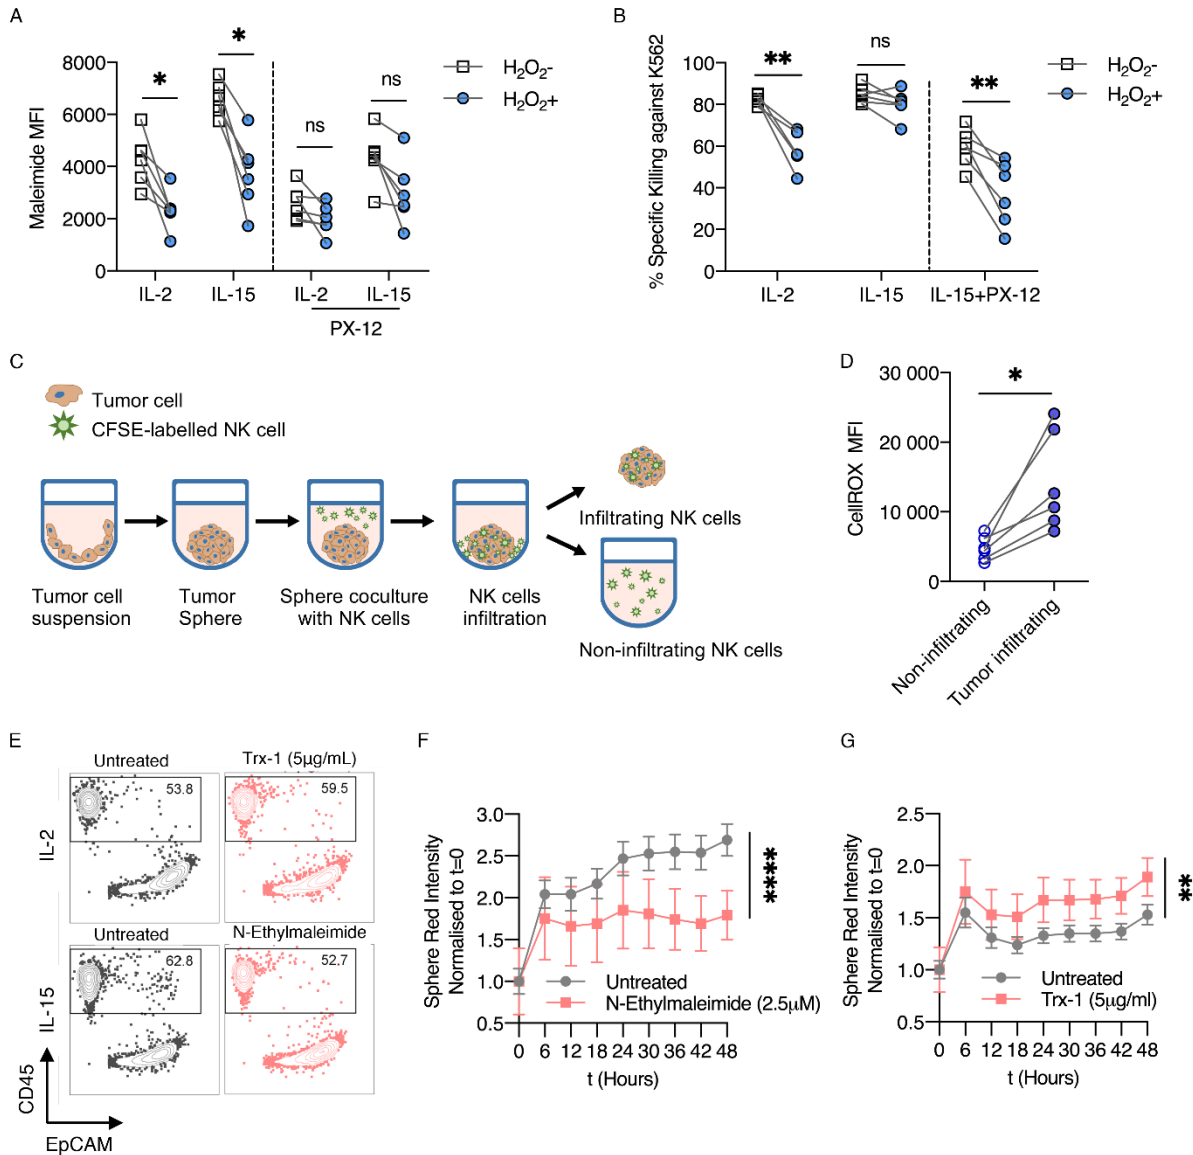

### Supplementary Figure 2. Inhibition of thioredoxin-1 abrogates IL-15-mediated protection against oxidative stress.

(A) MFI of maleimide staining on cytokine-primed NK cells treated with PX-12 and 10 $\mu$ M  $H_2O_2$  (n=6). (B) Percentage killing of K562 targets by cytokine-primed NK cells treated with PX-12 and  $H_2O_2$ , NK: K562 at the ratio of 5:1 (n=6). (A and B) RM two-way ANOVA with Sidak's multiple comparisons test was used to test for significance. (C) Diagram depicting tumor sphere model with CFSE-labelled NK cells to investigate NK cell infiltration. (D) MFI of CellROX staining comparing tumor-infiltrating and non-infiltrating NK cells outside and within tumor spheroids (n=6). Wilcoxon rank sum test was used to test for significance. (E) Representative FACS plot showing percentage of CD45-positive infiltrating NK cells into H1299 tumor sphere (n=3). (F and G) Mean red intensity of spheres infiltrated with fluorescence-labelled NK cells over time with treatment of (F) N-ethylmaleimide (2.5mM) and (G) recombinant thioredoxin-1 (5mg/ml) (n=3). (A, B and D) Data points are connected for matching replicates. (F and G) Data are presented as mean $\pm$ SD; two-way ANOVA was used to test for significance between treatment conditions. \*P<0.05, \*\*P<0.01, \*\*\*\*P<0.0001 and ns for non-significant.

### Supplementary Figure 3.

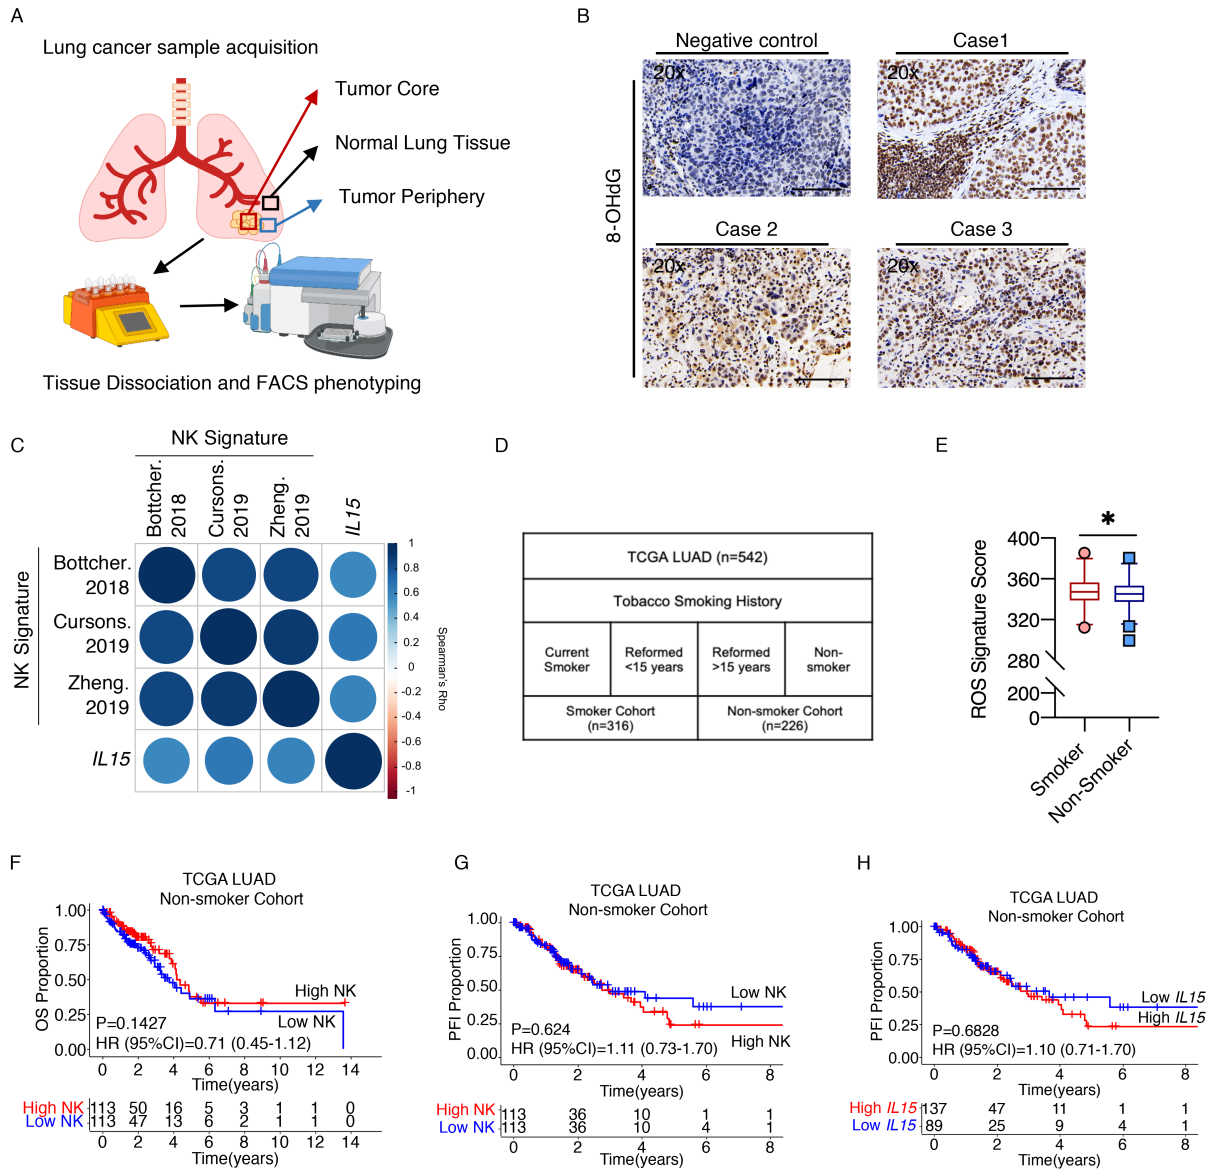

### Supplementary Figure 3. Relationship between tobacco smoking, *IL15* gene expression and NK cell gene signature in NSCLC patients.

(A) Graphic description of lung cancer sample acquisition (n=28). (B) IHC staining of 8-OHdG in NSCLC tumor tissues from 3 patients. Negative control was done without primary antibody. Scale bar denotes 50µm. (C) Correlation matrix between 3 versions of NK cell signature and *IL15* gene expression in TCGA LUAD cohort. All correlation shown has a p value<0.0001. (D) Classification of TCGA-LUAD cohort based on smoking history. (E) ROS-related gene signature score comparing smoker (n=316) and non-smoker (n=226) cohort. Data are presented as Tukey boxplots; Mann Whitney test was used to test for significance. \*P<0.05. (F) Overall survival of TCGA-LUAD cohort non-smoker group based on median of NK gene signature score. (G) Progression Free interval of TCGA-LUAD cohort non-smoker group based on median of NK gene signature score. (H) Progression Free interval of TCGA-LUAD cohort non-smoker group based on median of *IL15* gene expression. (F-H) Logrank test was used to test for significance in differences in survival distribution (n=226).

## Supplementary Figure 4.

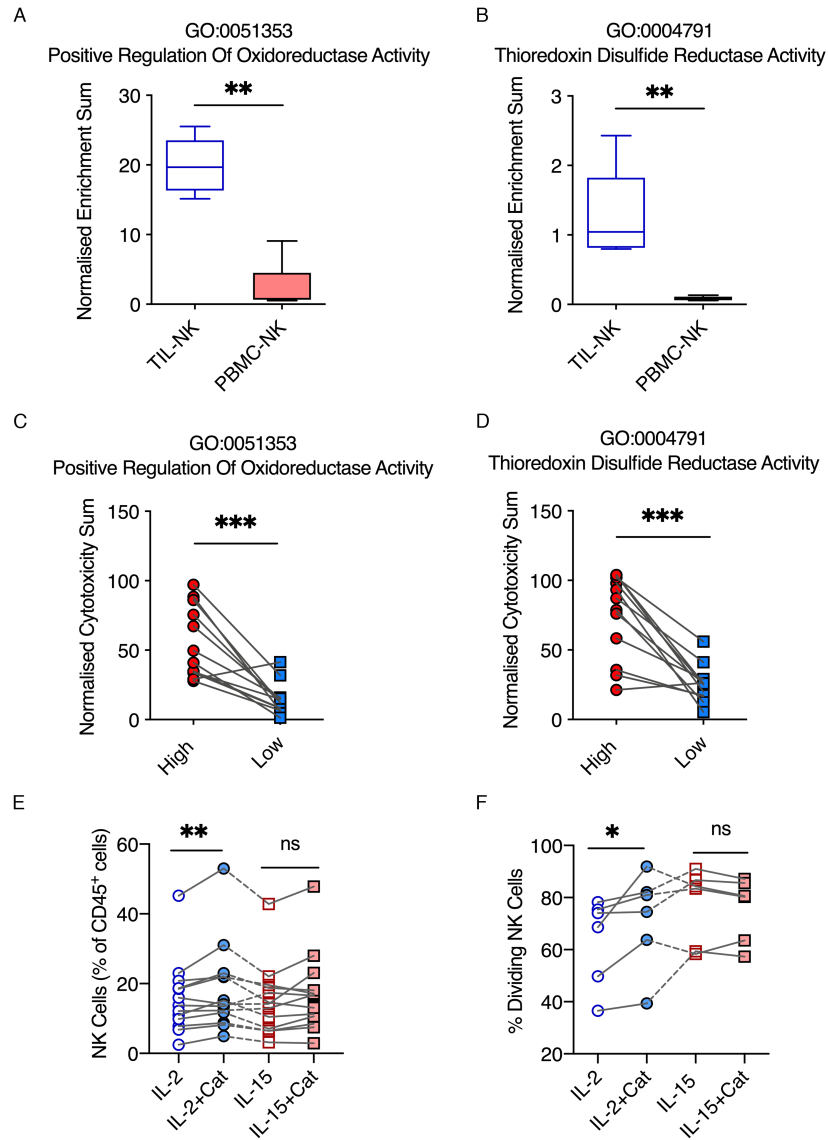

### Supplementary Figure 4. Oxidoreductase activity is associated with NK cytotoxicity and recruitment of immune cells.

(A) Geometric mean of normalized enrichment score for GO:0051353 comparing tumor-infiltrating NK cells versus peripheral blood NK cells. (B) Geometric mean of normalized enrichment score for GO:0004791 comparing tumor-infiltrating NK cells versus peripheral blood NK cells. (A and B) Data was analyzed from pooled NSCLC tumors(n=7) and patients' peripheral blood(n=6), and presented as Tukey boxplots; Mann-Whitney test was used to test for significance. Geometric mean of normalized cytotoxicity score comparing NK cell populations defined by (C) GO:0051353 enrichment and (D) GO:0004791 enrichment. (C and D) Wilcoxon signed rank test was used to test for significance. (E) Percentage of NK cells in NSCLC TILs cultures primed with either IL-2 or IL-15 with catalase treatment. (F) Percentage of dividing NK cells in sarcoma TILs cultures primed with either IL-2 or IL-15 with catalase treatment. (E and F) RM two-way ANOVA with Sidak's test was used to test for significance. \*P<0.05, \*\*P<0.01 and ns for non-significant. All individual data points are connected for matching replicates.

**Supplementary Table 1.** Clinical characteristics of non-small lung cancer patient cohort

| CASE NO. | AGE (YEARS) | GENDER | SMOKING HISTORY | TUMOR SIZE (CM) | PATHOLOGY TYPE | TNM CLASSIFICATION | STAGE (AJCC) | TUMOR LOCATION |
|----------|-------------|--------|-----------------|-----------------|----------------|--------------------|--------------|----------------|
| 1*       | 56          | F      | N               | 5.0x5.0         | LUAD           | T2bN0M0            | IB           | LLL            |
| 2*       | 55          | M      | N               | 3.0x2.7         | LUSC           | T1cN0M0            | IA3          | RUL            |
| 3*       | 64          | M      | N               | 4.2x3.0         | LUSC           | T2bN1M0            | IIB          | LLL            |
| 4*       | 75          | M      | N               | 2.0x2.0         | LUAD           | T1bN0M0            | IA2          | LUL            |
| 5*       | 76          | F      | N               | 1.5x1.2         | LUAD           | T1bN0M0            | IA2          | LLL            |
| 6*       | 61          | F      | N               | 5.5x2.5         | LUAD           | T3N1M0             | IIIA         | RLL            |
| 7*       | 46          | F      | N               | 1.4x1.0         | LUAD           | T3N0M0             | IIB          | LLL            |
| 8*       | 63          | M      | Y               | 2.5x2.0         | LUAD           | T1cN0M0            | IA3          | RML            |
| 9*       | 71          | M      | Y               | 2.6x1.6         | LUAD           | T1cN0M0            | IA3          | RLL            |
| 10*      | 60          | M      | Y               | 1.2x1.1         | LUAD           | T1bN0M0            | IA2          | LUL            |
| 11*      | 67          | M      | Y               | 2.5x2.0         | LUAD           | T2sN1M0            | IIB          | RUL            |
| 12*      | 73          | M      | Y               | 1.0x0.7         | LUAD           | T1aN0M0            | IA           | RLL            |
| 13*      | 51          | M      | Y               | 2.0x2.0         | LUSC           | T1bN2M0            | IIIA         | RML            |
| 14*      | 67          | F      | N               | 1.2x0.6         | LUAD           | T1bN0M0            | IA2          | LLL            |
| 15*      | 65          | M      | N               | 2.5x1.5         | LUAD           | T1cN0M0            | IA3          | LUL            |
| 16*      | 70          | F      | N               | 2.8x2.0         | LUAD           | T1cN0M0            | IA3          | RLL            |
| 17*      | 56          | M      | Y               | 1.7x1.3         | LUSC           | T1bN2M0            | IIIA         | RML            |
| 18*      | 61          | M      | Y               | 1.5x1.1         | LUAD           | T1aN0M0            | IA2          | RML            |
| 19*      | 71          | M      | N               | 4.0x3.0         | LUSC           | T2aN0M0            | IB           | RML            |
| 20*      | 55          | M      | N               | 2.5x1.0         | LUAD           | T1cN0M0            | IA3          | RUL            |
| 21*      | 44          | M      | N               | 2.5x0.7         | LUAD           | T1cN0M0            | IA3          | RLL            |
| 22*      | 52          | F      | N               | 2.0x1.2         | LUAD           | T1bN0M0            | IA2          | LUL            |
| 23*      | 59          | M      | N               | 1.1x1.0         | LUAD           | T1bN0M0            | IA2          | LUL            |
| 24       | 63          | M      | Y               | 1.5x1.0         | LUSC           | T1bN0M0            | IA2          | LUL            |
| 25       | 71          | F      | N               | 1.4x1.0         | LUAD           | T1bN0M0            | IA2          | RLL            |
| 26       | 55          | F      | Y               | 2.2x1.0         | LUAD           | T1cN0M0            | IA3          | RML            |
| 27       | 66          | M      | N               | 3.0x3.0         | LUSC           | T1cN1M0            | IIB          | LLL            |
| 28       | 49          | F      | N               | 2.0x1.3         | LUAD           | T1bN0M0            | IA2          | LLL            |
| 29       | 55          | M      | Y               | 2.5x2.3         | LUAD           | T1cN0M0            | IA3          | RUL            |

**AJCC:** American Joint Committee on Cancer: 8<sup>th</sup>edition. **LLL:** Left lower lobe. **LUL:** Left upper lobe. **RUL:** Right upper lobe. **RML:** Right middle lobe. **RLL:** Right lower lobe. \* Cases were separated into Smoker and Non-smoker cohorts for CellROX staining, the rest were only used for TILs culture.

**Supplementary Table 2. Clinical characteristics of sarcoma patient cohort**

| <b>Case No.</b> | <b>Age (years)</b> | <b>Gender</b> | <b>Tumor size (cm)</b> | <b>Type</b> | <b>Site</b>     | <b>Pathology type</b>                                    | <b>Necrosis</b> | <b>Mitotic rate</b> | <b>Grade</b> | <b>Grading system</b> |
|-----------------|--------------------|---------------|------------------------|-------------|-----------------|----------------------------------------------------------|-----------------|---------------------|--------------|-----------------------|
| <b>1</b>        | 81                 | M             | 6.5 x 5.3 x 3.0        | Primary     | Subcutaneous    | Myxofibrosarcoma                                         | <50%            | >20 / 10 HPF        | 3            | FNCLCC                |
| <b>2</b>        | 86                 | M             | 5.0 x 3.2 x 2.5        | Primary     | Subcutaneous    | Undifferentiated pleomorphic sarcoma (UPS), spindle cell | <50%            | >20 / 10 HPF        | 3            | FNCLCC                |
| <b>3</b>        | 42                 | F             | 12.0 x 9.0 x 6.0       | Recurrence  | Subcutaneous    | Malignant peripheral nerve sheath tumor (MPNST)          | <50%            | >20 / 10 HPF        | n.a.         |                       |
| <b>4</b>        | 76                 | M             | 6.0 x 6.0 x 5.0        | Recurrence  | Retroperitoneal | Inflammatory myofibroblastic tumor (IMT)                 | 0%              | <10 / 10 HPF        | 1            | FNCLCC                |
| <b>5</b>        | 62                 | F             | 28.0 x 16.0 x 8.0      | Primary     | Retroperitoneal | Well-differentiated liposarcoma                          | 0%              | <10 / 10 HPF        | 1            | FNCLCC                |
| <b>6</b>        | 33                 | F             | 6.0 x 4.0 x 3.0        | Recurrence  | Intramuscular   | Pleomorphic liposarcoma                                  | 0%              | >10 / 10 HPF        | 2            | FNCLCC                |
| <b>7</b>        | 77                 | F             | 6.5 x 5.5 x 4.5        | Recurrence  | Intramuscular   | Myxofibrosarcoma                                         | 0%              | >10 / 10 HPF        | 2            | FNCLCC                |
| <b>8</b>        | 80                 | F             | 16.0x13.0x10.0         | Primary     | Intraabdominal  | Abdominal desmoid                                        | 0%              | 0 / 10 HPF          | n.a.         |                       |
| <b>9</b>        | 76                 | K             | 10.0 x 7.0 x 7.0       | Primary     | Subcutaneous    | Undifferentiated pleomorphic sarcoma (UPS), epitheloid   | >50%            | >20 / 10 HPF        | 2            | FNCLCC                |
| <b>10</b>       | 67                 | F             | 9.5 x 8.0 x 6.0        | Primary     | Subcutaneous    | Well-differentiated liposarcoma                          | 0%              | 0 / 10 HPF          | 1            | FNCLCC                |
| <b>11</b>       | 28                 | F             | 8.0 x 6.0 x 5.0        | Primary     | Thorax          | Aggressive fibromatosis                                  | 0%              | <10 / 10 HPF        | n.a.         |                       |
| <b>12</b>       | 39                 | F             | 5.0 x 5.0 x 5.0        | Primary     | Retroperitoneal | Pleomorphic leiomyosarcoma                               | <50%            | >20 / 10 HPF        | 3            | FNCLCC                |
| <b>13</b>       | 81                 | K             | 11.0 x 8.0 x 8.0       | Primary     | Intramuscular   | Undifferentiated pleomorphic sarcoma (UPS), spindle cell | <50%            | >20 / 10 HPF        | 3            | FNCLCC                |
| <b>14</b>       | 73                 | K             | 7.5 x 5.5 x 4.5        | Primary     | Subcutaneous    | Spindle-cell lipoma                                      | 0%              | 0 / 10 HPF          | n.a.         |                       |
| <b>15</b>       | 77                 | K             | 8.0 x 4.0 x 3.5        | Primary     | Subcutaneous    | Angiosarcoma                                             | 0%              | <10 / 10 HPF        | 2            | WHO                   |

**Supplementary Table 3. Antibody and reagent information**

| <b>ANTIGEN</b>                     | <b>FLUOROCHROME</b> | <b>CLONE</b> | <b>ISOTYPE</b> | <b>COMPANY</b> | <b>CATALOG NO.</b> |
|------------------------------------|---------------------|--------------|----------------|----------------|--------------------|
| <b>CD3</b>                         | PE                  | OKT3         | Mouse IgG2a, κ | Biologend      | 317308             |
| <b>CD3</b>                         | PE-CF594            | SP34-2       | Mouse IgG1, κ  | BD             | 562406             |
| <b>CD4</b>                         | PE                  | SK3          | Mouse IgG1, κ  | Biologend      | 344606             |
| <b>CD4</b>                         | Pacific Blue        | SK3          | Mouse IgG1, κ  | Biologend      | 344625             |
| <b>CD8</b>                         | PE-Cy7              | RPA-T8       | Mouse IgG1, κ  | BD             | 557746             |
| <b>CD8a</b>                        | PerCP-Cy5.5         | RPA-T8       | Mouse IgG1, κ  | Biologend      | 301032             |
| <b>CD16</b>                        | PerCP-Cy5.5         | 3G8          | Mouse IgG1, κ  | Biologend      | 302028             |
| <b>CD16</b>                        | Pacific Blue        | 3G8          | Mouse IgG1, κ  | Biologend      | 302032             |
| <b>CD56</b>                        | PE-Cy7              | HCD56        | Mouse IgG1, κ  | Biologend      | 318318             |
| <b>CD56</b>                        | BV785               | 5.1H11       | Mouse IgG1, κ  | Biologend      | 362550             |
| <b>CD56</b>                        | BV570               | HCD56        | Mouse IgG1, κ  | Biologend      | 318329             |
| <b>CD45</b>                        | BV650               | HI30         | Mouse IgG1, κ  | Biologend      | 304043             |
| <b>CD107a</b>                      | PerCP-Cy5.5         | H4A3         | Mouse IgG1, κ  | Biologend      | 328615             |
| <b>CD107a</b>                      | FITC                | H4A3         | Mouse IgG1, κ  | Biologend      | 328606             |
| <b>IFN-γ</b>                       | APC                 | B27          | Mouse IgG1, κ  | Biologend      | 506510             |
| <b>Ki-67</b>                       | AF700               | B56          | Mouse IgG1, κ  | BD             | 561277             |
| <b>S6(pS235/pS236)</b>             | AF488               | N7-548       | Mouse IgG1, κ  | BD             | 560434             |
| <b>8-Hydroxy-2'-Deoxyguanosine</b> | /                   | N45.1        | Mouse IgG1     | Abcam          | Ab48508            |
| <b>NCAM/CD56</b>                   | /                   | polyclonal   | Rabbit, IgG    | Proteintech    | 14225-1            |
| <b>TXNIP</b>                       | /                   | EPR14774     | Rabbit, IgG    | Abcam          | ab188865           |
| <b>Thioredoxin-1</b>               | /                   | EPR6111      | Rabbit, IgG    | Abcam          | ab109385           |
| <b>Cell Trace™ Violet</b>          | /                   | /            | /              | Invitrogen     | C34557             |
| <b>CFSE</b>                        | /                   | /            | /              | Biologend      | 423801             |
| <b>AUQA live/dead</b>              | /                   | /            | /              | Invitrogen     | L34957             |
| <b>Near-IR live/dead</b>           | /                   | /            | /              | Invitrogen     | L10119             |

**Supplementary Table 4.** Primers used for qRT-PCR

| <b>Gene</b>          | <b>Forward (5'-3')</b>  | <b>Reverse (5'-3')</b>  |
|----------------------|-------------------------|-------------------------|
| <b><i>TBP</i></b>    | CCACTCACAGACTCTCACAAC   | CTGCGGTACAATCCCAGAACT   |
| <b><i>TXN</i></b>    | GTGAAGCAGATCGAGAGCAAG   | CGTGGCTGAGAAGTCAACTACTA |
| <b><i>TXN2</i></b>   | TTCAAGACCGAGTGGTCAACA   | CACCTCATACTCAATGGCGAG   |
| <b><i>TXNIP</i></b>  | GGTCTTTAACGACCCTGAAAAGG | ACACGAGTAACTTCACACACCT  |
| <b><i>TXNRD1</i></b> | TAGGACAAGCCCTGCAAGACT   | CCCCAATTCAAAGAGCCAATGT  |
